# Supplementary material for: Review of mathematical models of HSV-2 vaccination: Implications for vaccine development
Source: PubMed Central journal article supplement (PMC6892260; doi:10.1016/j.vaccine.2018.02.067), 2019-11-28
Supplement: mmc1.pdf [file mmc1.pdf]

# Supplemental materials for ‘Review of mathematical models of HSV-2 vaccination: Implications for vaccine development’

## Newton model reproduction

Because Newton *et al.* (2000) only reported on reductions in prevalence associated with vaccination, and also because the model was fairly straight-forward to implement exactly as the authors had done, we reproduced their model in R using the deSolve package to solve the differential equations. The differential equations are:

$$\begin{aligned} \frac{dS}{dt} &= -\mu S - \tau\kappa S - \beta S(\rho_H I_H + \rho_M I_M + \rho_L I_L)(1 - VE_I) + \mu N \\ \frac{dE}{dt} &= -\mu E - \nu_1 E + \beta S(\rho_H I_H + \rho_M I_M + \rho_L I_L)(1 - VE_I) \\ \frac{dI_H}{dt} &= -\mu I_H + \nu_1 E - \nu_2 I_H \\ \frac{dI_M}{dt} &= -\mu I_M - \nu_4 I_M + \nu_3 I_L \\ \frac{dI_L}{dt} &= -\mu I_L + \nu_4 I_M + \nu_2 I_H - \nu_3 I_L \\ \frac{dV}{dt} &= -\mu V + \tau\kappa S \end{aligned}$$

and the associated parameter symbols, descriptions, and values used in their manuscript and here are:

| Symbol   | Name                                    | Value                                  |
|----------|-----------------------------------------|----------------------------------------|
| $\mu$    | birth and death rate                    | 1 / 9 years                            |
| $\nu_1$  | rate of transition from E to $I_H$      | 1 / 6 days                             |
| $\nu_2$  | rate of transition from $I_H$ to $I_L$  | 1 / 12 days                            |
| $\nu_3$  | rate of transition from $I_L$ to $I_M$  | 1 / 69 days                            |
| $\nu_4$  | rate of transition from $I_M$ to $I_L$  | 1 / 4 days                             |
| $\rho_H$ | probability of transmission from $I_H$  | 0.9                                    |
| $\rho_M$ | probability of transmission from $I_M$  | 0.5                                    |
| $\rho_L$ | probability of transmission from $I_L$  | 0.1                                    |
| $\tau$   | proportion in whom the vaccine takes    | 1.0                                    |
| $\kappa$ | rate of vaccination                     | 0, 1, or 2 % of susceptibles per month |
| $\beta$  | contact rate                            | 1.6 / year                             |
| $VE_I$   | vaccine efficacy against infectiousness | 0, 0.5, or 0.75                        |

Under a prophylactic vaccine, Newton *et al.* (2000) assume sterilizing immunity vaccine effects, where susceptible individuals who are vaccinated enter a vaccinated compartment, and are no longer able to be infected. Under this scenario,  $\kappa$  takes a non-zero value, and determines the rate of vaccination.

Under a therapeutic vaccine, Newton *et al.* (2000) assume all currently and infected individuals have reduced infectivity, determined by  $VE_I$ .

Initial conditions are such that, from a total stable population size of 10000, 9500 are S, 1 is E, 2 are  $I_H$ , 470 are  $I_L$ , and 27 are  $I_R$ . Under either vaccination scenario, the model is ran from its initial conditions for 20 years before vaccination begins.

Vaccine impact is calculated by comparing the incidence rate in each vaccination scenario to the incidence rate in the null scenario 10 years after vaccination began.

**Figure S1**

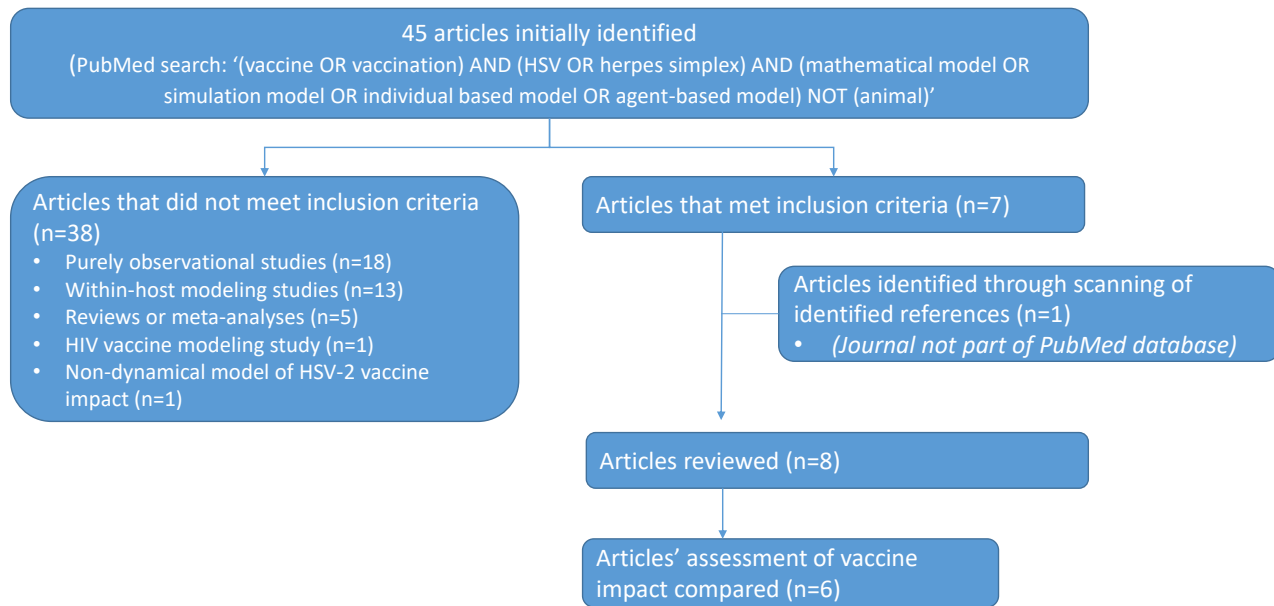

Figure S2

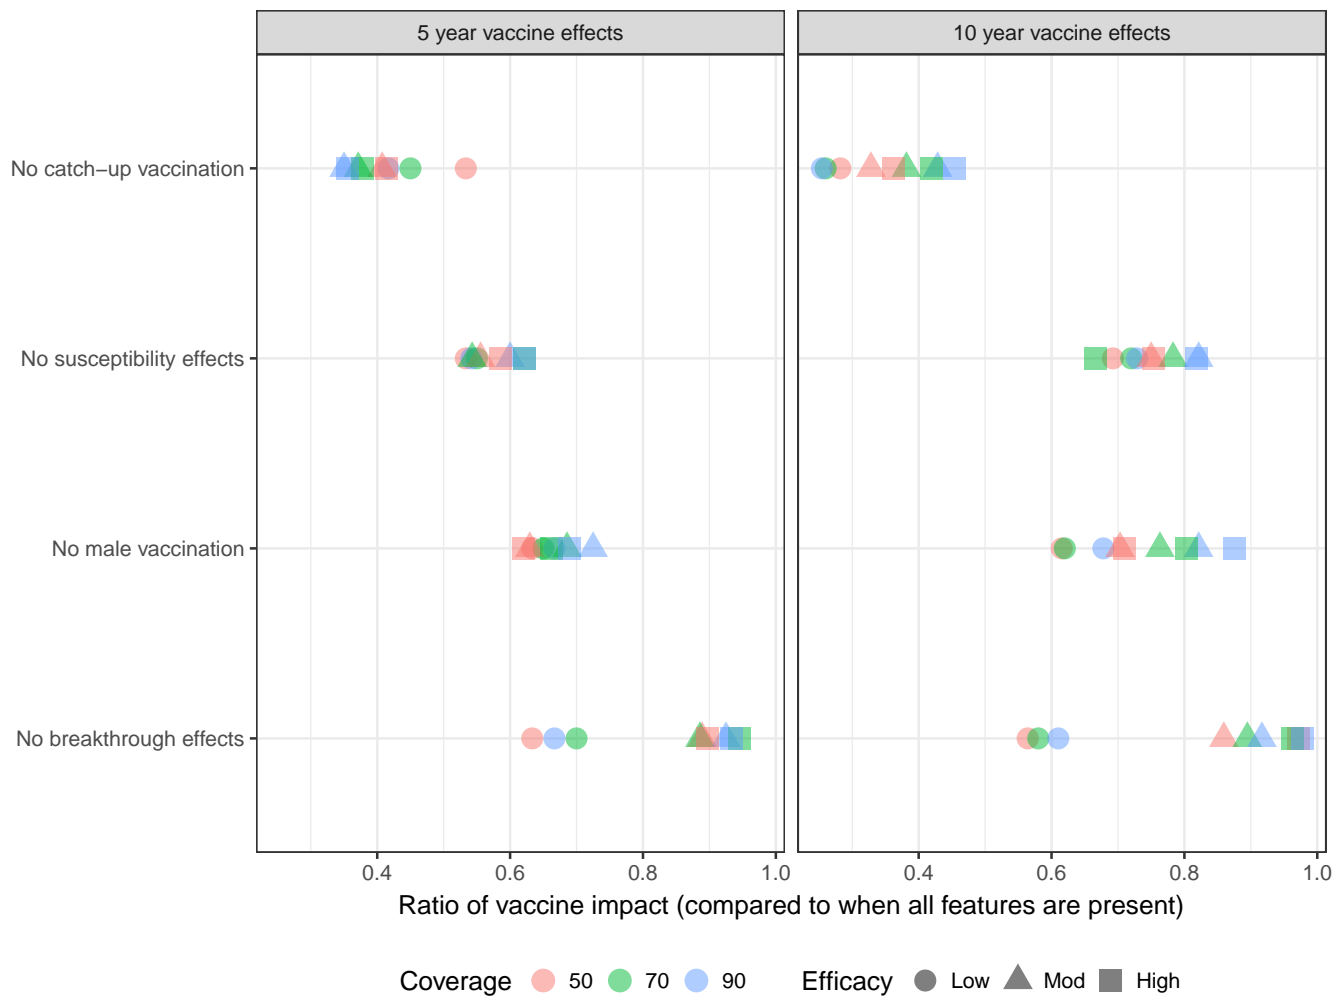

Comparison of incremental vaccine impact in Freeman *et al.* when a single feature is not present 10 years after vaccination began. Vaccine impact is defined as the incidence rate reduction 10 years after vaccination began. Scenarios defined along the y-axis are compared to a base-scenario that had the greatest vaccine impact in which all four features (i.e. catch-up vaccination, susceptibility effects, vaccination of both sexes, and breakthrough effects) are present. Each ratio is compared assuming the same level of coverage (color in the figure), vaccine efficacy (shape), and duration of conferred vaccine effects (left versus right panel). Lack of catch-up vaccination has the strongest detrimental effect, since vaccine impact is about 60% lower without it.

**Table S1**

| Author                                                                 | Model framework                                  | Sexual activity      | Setting and baseline prevalence                         | Vaccine efficacy                                        | Vaccine take                       | Vaccine duration          | Target population for vaccination                                                                          | Vaccination strategy and coverage                                                                                               | Predicted HSV-2 incidence reduction |
|------------------------------------------------------------------------|--------------------------------------------------|----------------------|---------------------------------------------------------|---------------------------------------------------------|------------------------------------|---------------------------|------------------------------------------------------------------------------------------------------------|---------------------------------------------------------------------------------------------------------------------------------|-------------------------------------|
| <i>Prophylactic vaccines - susceptibility effects only</i>             |                                                  |                      |                                                         |                                                         |                                    |                           |                                                                                                            |                                                                                                                                 |                                     |
| Garnett (S)                                                            | 2-sex deterministic compartmental                | Heterogeneous levels | North America<br>HSV-2: 25%<br>HSV-1: 60%               | $VE_S=100\%$                                            | 13 or 62%                          | Life                      | HSV-1 negative females primarily. Examined males+females in a single scenario (not shown)                  | 50% coverage at sexual debut and 5% of sexually active unvaccinated susceptibles per year                                       | 5-33% after 30 years                |
| Freeman (S)                                                            | 2-sex stochastic discrete individual based model | Heterogeneous levels | Sub-Saharan Africa<br>HSV-2: 15 or 41%<br>HIV: 3 or 19% | $VE_S=30, 70, \text{ or } 90\%$                         | 100%                               | 5 years, 10 years or life | Both sexes aged 15-29 years old regardless of HSV-1 status. Examined scenarios with only females in Fig. 5 | Routine vaccination at sexual debut, and initial catch-up vaccination in order to achieve 50, 70 or 90% coverage after 5 years. | 10-86% after 10 years               |
| Newton (S)                                                             | 1-sex deterministic compartmental                | Homogeneous levels   | Unspecified geographic setting<br>HSV-2: 38%            | $VE_S=100\%$                                            | 100%                               | Life                      | 1-sex model without taking into account HSV-1 status.                                                      | 1 or 2% of sexually active susceptibles vaccinated per month                                                                    | 62-81% after 10 years               |
| <i>Prophylactic vaccines - susceptibility and breakthrough effects</i> |                                                  |                      |                                                         |                                                         |                                    |                           |                                                                                                            |                                                                                                                                 |                                     |
| Schwartz 2005 (S,I,P)                                                  | 1-sex deterministic compartmental                | Homogeneous levels   | North America<br>HSV-2: 22 or 60%                       | Varied independently:<br>$VE_S=VE_I=VE_L=VE_R=30-100\%$ | Varied: 30-100%                    | Varied: 10-20 years       | 1-sex model without taking into account HSV-1 status.                                                      | 30-90% varied coverage at sexual debut                                                                                          | 3-36% after 10 years                |
| Alsallaq (S,I)                                                         | 1-sex deterministic compartmental                | Heterogeneous levels | Sub-Saharan Africa<br>HSV-2: 52%                        | $VE_S=30\%$<br>$VE_R=75\%$                              | 100%                               | Life                      | 1-sex model without taking into account HSV-1 status.                                                      | Mass vaccination with 100% coverage at sexual debut and mass vaccination with 100% coverage of adults within one year           | 21-30% after 10 years               |
| Garnett (S,I,P)                                                        | 2-sex deterministic compartmental                | Heterogeneous levels | North America<br>HSV-2: 25%<br>HSV-1: 60%               | $VE_S=VE_I=100\%$                                       | 13 or 62% for S<br>39 or 88% for I | Life                      | HSV-1 negative females primarily. Examined males+females in a single scenario (not shown)                  | 50% coverage at sexual debut and 5% of sexually active unvaccinated susceptibles per year                                       | 15-40% after 30 years               |
| Freeman (S,I,P)                                                        | 2-sex stochastic discrete individual based model | Heterogeneous levels | Sub-Saharan Africa<br>HSV-2: 15 or 41%<br>HIV: 3 or 19% | $VE_S=VE_L=VE_R=30, 70, \text{ or } 90\%$               | 100%                               | 5 years, 10 years or life | Both sexes aged 15-29 years old regardless of HSV-1 status. Examined scenarios with only females in Fig. 5 | Routine vaccination at sexual debut, and initial catch-up vaccination in order to achieve 50, 70 or 90% coverage after 5 years. | 15-88% after 10 years               |
| <i>Prophylactic vaccines - breakthrough effects only</i>               |                                                  |                      |                                                         |                                                         |                                    |                           |                                                                                                            |                                                                                                                                 |                                     |
| Garnett (I,P)                                                          | 2-sex deterministic compartmental                | Heterogeneous levels | North America<br>HSV-2: 25%<br>HSV-1: 60%               | $VE_P=100\%$                                            | 39 or 88%                          | Life                      | HSV-1 negative females primarily. Examined males+females in a single scenario (not shown)                  | 50% coverage at sexual debut and 5% of sexually active unvaccinated susceptibles per year                                       | 11-37% after 30 years               |
| Freeman (I,P)                                                          | 2-sex stochastic discrete individual based model | Heterogeneous levels | Sub-Saharan Africa<br>HSV-2: 15 or 41%<br>HIV: 3 or 19% | $VE_L=VE_R=30, 70, \text{ or } 90\%$                    | 100%                               | 5 years, 10 years or life | Both sexes aged 15-29 years old regardless of HSV-1 status. Examined scenarios with only females in Fig. 5 | Routine vaccination at sexual debut, and initial catch-up vaccination in order to achieve 50, 70 or 90% coverage after 5 years. | 8-72% after 10 years                |

-----  
*Therapeutic vaccines - no susceptibility effects*

|                           |                                         |                            |                                                    |                                                                    |                    |                           |                                                        |                    |                                                                       |                          |
|---------------------------|-----------------------------------------|----------------------------|----------------------------------------------------|--------------------------------------------------------------------|--------------------|---------------------------|--------------------------------------------------------|--------------------|-----------------------------------------------------------------------|--------------------------|
| Schwartz<br>2007<br>(I,P) | 1-sex<br>deterministic<br>compartmental | Homo-<br>geneous<br>levels | North<br>America<br>HSV-2: 22%                     | Varied<br>independently:<br>$VE_I =$<br>$VE_L = VE_R =$<br>30-100% | Varied:<br>30-100% | Varied:<br>10-20<br>years | 1-sex model<br>taking into<br>account<br>HSV-1 status. | without<br>account | 30-90% of those with<br>latent HSV-2 infection<br>vaccinated per year | 24-80% after<br>10 years |
| Newton<br>(I)             | 1-sex<br>deterministic<br>compartmental | Homo-<br>geneous<br>levels | Unspecified<br>geographic<br>setting<br>HSV-2: 38% | $VE_I = 50$<br>or 75%                                              | 100%               | Life                      | 1-sex model<br>taking into<br>account<br>HSV-1 status. | without<br>account | Mass vaccination of all<br>current and newly HSV-<br>2 infected       | 74-91%<br>10 years       |

-----  
*Excluded from impact comparison*

|                   |                                         |                            |                                                                        |                                                    |                   |          |                                                        |                    |                                                                                                       |                            |
|-------------------|-----------------------------------------|----------------------------|------------------------------------------------------------------------|----------------------------------------------------|-------------------|----------|--------------------------------------------------------|--------------------|-------------------------------------------------------------------------------------------------------|----------------------------|
| Lou<br>(S)        | 2-sex<br>deterministic<br>compartmental | Homo-<br>geneous<br>levels | North<br>America<br>HSV-2: 22%<br>Unspecified<br>geographic<br>setting | $VE_S = 100\%$                                     | Varied:<br>0-100% | Life     | HSV-1 negative females<br>only                         |                    | Varied 0-100% coverage<br>at sexual debut                                                             | 0-100% after<br>1000 years |
| Podder<br>(S,I,P) | 1-sex<br>deterministic<br>compartmental | Homo-<br>geneous<br>levels | Unspecified<br>geographic<br>setting<br>HSV-2:<br>arbitrarily<br>small | $VE_S = 60\%$<br>$VE_I = 30-40\%$<br>$VE_L = 33\%$ | 60%               | 15 years | 1-sex model<br>taking into<br>account<br>HSV-1 status. | without<br>account | 50% coverage at sexual<br>debut and 60% of sexu-<br>ally active unvaccinated<br>susceptibles per year | -                          |

Table 1: Characteristics and predictions of HSV-2 vaccine modeling literature scenarios. Biological vaccine effects in parentheses reflect vaccines with some combination of susceptibility (**S**), infectiousness (**I**), and pathogenicity (**P**) effects. Multiple scenarios per article are possible when an article considered different scenarios defined by the type(s) of biological vaccine effects being conferred. Articles are organized by vaccine design (prophylactic, prophylactic with breakthrough effects, and therapeutic) and within these categories by increasing magnitude of impact. 1-sex models do not differentiate between males and females; 2-sex models represent females and males separately, allowing for vaccination of one or both sexes. Bounds represent upper and lower predictions either based on ranges from all the samples generated (Schwartz), or upper and lower estimates when only two data points were predicted (Garnett, Alsallaq, Freeman, Newton). \*Vaccine increased duration of symptomatic period compared to unvaccinated
